# Supplementary material for: Splenic Elemental Composition of Breast Cancer-Suffering Rats Supplemented with Pomegranate Seed Oil and Bitter Melon Extract
Source: MDPI journal article supplement (doi:10.3390/molecules29091942), 2024-04-24
Supplement: s1 [file s1]

**Table S1.** Values of limit of detection (LOD) and limit of quantitation (LOQ) of detected minerals.

|               | LOD [mg/kg] | LOQ [mg/kg] | LOD [ug/L] | LOQ [ug/L] |
|---------------|-------------|-------------|------------|------------|
| macroelements |             |             |            |            |
| K             | 2.216       | 2.244       | 8.36       | 8.49       |
| Mg            | 0.513       | 0.525       | 0.92       | 0.93       |
| Na            | 11.353      | 11.537      | 8.95       | 9.16       |
| Ca            | 1.812       | 1.829       | 8.72       | 8.84       |
| microelements |             |             |            |            |
| Fe            | 0.827       | 0.858       | 0.76       | 0.85       |
| Zn            | 0.276       | 0.278       | 1.90       | 1.92       |
| Cu            | 0.243       | 0.246       | 1.67       | 1.68       |
| Mn            | 0.008       | 0.009       | 0.00       | 0.00       |
| Se            | 0.014       | 0.023       | 0.83       | 0.85       |
| Co            | 0.001       | 0.001       | 0.08       | 0.08       |
| Cr            | 0.067       | 0.068       | 0.52       | 0.52       |
| Ni            | 0.027       | 0.028       | 0.37       | 0.37       |
| Al            | 11.285      | 11.368      | 12.20      | 12.20      |
| Sr            | 0.020       | 0.021       | 0.73       | 0.74       |
| Pb            | 0.045       | 0.046       | 0.62       | 0.63       |
| Cd            | 0.001       | 0.001       | 0.10       | 0.10       |
| B             | 0.311       | 0.328       | 5.27       | 5.36       |
| Tl            | 0.003       | 0.004       | 0.39       | 0.39       |

**Table S2.** Chemical characteristic of dietary supplements.

| Fatty acid [μg/g]                                    | BME  | PSO   |
|------------------------------------------------------|------|-------|
| C6:0                                                 | nd   | 7.63  |
| C8:0                                                 | nd   | 10.55 |
| C10:0                                                | nd   | 4.05  |
| C12:0                                                | 0.12 | 11.63 |
| C14:0                                                | 0.41 | 50.9  |
| C15:0                                                | 0.16 | 26.2  |
| <i>cis</i> 7 C15:1                                   | nd   | 5.85  |
| C16:0                                                | 2.42 | 6555  |
| <i>cis</i> 7 C16:1                                   | 0.34 | 26.3  |
| <i>cis</i> 9 C16:1                                   | nd   | 8.31  |
| C17:0                                                | 0.15 | 155   |
| <i>cis</i> 6C17:1                                    | nd   | nd    |
| <i>cis</i> 9C17:1                                    | nd   | 8.77  |
| C18:0                                                | 6.58 | 6483  |
| <i>trans</i> 11C18:1                                 | nd   | 24.7  |
| <i>cis</i> 9 C18:1                                   | 0.58 | 12170 |
| <i>cis</i> 11 C18:1                                  | nd   | 833   |
| <i>cis</i> 14 C18:1                                  | nd   | 7.73  |
| <i>cis</i> 9 <i>cis</i> 12 C18:2 (LA)                | nd   | 16748 |
| <i>cis</i> 6 <i>cis</i> 9 <i>cis</i> 12 C18:3 (GLA)  | nd   | 23.5  |
| <i>cis</i> 8 <i>cis</i> 11 <i>cis</i> 14 C18:3 n-4   | nd   | nd    |
| <i>cis</i> 9 <i>cis</i> 12 <i>cis</i> 15 C18:3 (ALA) | 0.42 | 1466  |

|                                                           |                               |                                   |
|-----------------------------------------------------------|-------------------------------|-----------------------------------|
| C20:0                                                     | 0.12                          | 1003                              |
| <i>cis</i> 11C20:1                                        | nd                            | nd                                |
| C21:0                                                     | nd                            | 60                                |
| C22:0                                                     | nd                            | 250                               |
| C24:0                                                     | nd                            | 100                               |
| Σ CLnA:                                                   | 0.00                          | 111000                            |
| <i>cis</i> 9 <i>trans</i> 11 <i>cis</i> 13 C18:3 (PA)     | nd                            | 45414                             |
| <i>cis</i> 9 <i>trans</i> 11 <i>trans</i> 13 C18:3 (αESA) | nd                            | 16280                             |
| Conjugated fatty acids:                                   |                               |                                   |
| ΣCFA:                                                     | 2.00                          | 723481                            |
| ΣCD:                                                      | 0.23                          | nd                                |
| <i>tt</i> isomers                                         | 0.23                          | nd                                |
| <i>ct/tc</i> isomers                                      | nd                            | nd                                |
| <i>cc</i> isomers                                         | nd                            | nd                                |
| ΣCT:                                                      | 1.77                          | 723481                            |
| <i>ttt</i> isomers                                        | 1.58                          | 546525                            |
| <i>ttc</i> isomers                                        | 0.11                          | 68660                             |
| <i>cct</i> isomers                                        | 0.07                          | 108296                            |
|                                                           |                               |                                   |
|                                                           | <b>BME 1% aqueous extract</b> | <b>BME 10% methanolic extract</b> |
| Compound [mg/100g dw.]:                                   |                               |                                   |
| Chlorogenic acid                                          | 6.33                          | 956                               |
| Caffeic acid                                              | nd                            | 26.0                              |
| Sinapic acid                                              | nd                            | 58.5                              |
| Isochlorogenic acid                                       | nd                            | 87.6                              |
| Rutin                                                     | tr                            | tr                                |
| Protocatechuic acid                                       | nd                            | tr                                |
| Luteolin                                                  | nd                            | tr                                |
| Kaempferol                                                | nd                            | tr                                |
| Epigallocatechin                                          | nd                            | tr                                |
| Quercetin                                                 | nd                            | tr                                |
| Quercitrin                                                | nd                            | tr                                |
| Total polyphenol content [g/l]                            | 640                           | 1489                              |
| DPPH [μmol Trolox/l]                                      | 290                           | 851                               |
| FRAP [μmol Fe2+/ l]                                       | 654                           | 154                               |
|                                                           |                               |                                   |
|                                                           | <b>PSO</b>                    |                                   |
| IV [mgI <sub>2</sub> /100g oil]                           | 120                           |                                   |
| PV [mEq O/kg oil]                                         | 5.74                          |                                   |
| AV [mg KOH/g oil]                                         | 6.94                          |                                   |

*cis*9*cis*12 C18:2 – linoleic acid (LA); *cis*6*cis*9*cis*12 C18:3 – γ-linolenic acid (GLA); *cis*9*cis*12*cis*15 C18:3 – α-linolenic acid (ALA); *cis*9*trans*11*cis*13 C18:3 – unctic acid (PA); *cis*9*trans*11*trans*13 C18:3 – α-eleostearic acid (αESA); CFA – conjugated fatty acids, CD – conjugated dienes, CT – conjugated trienes, cc – *cis,cis* isomers, *ct/tc* – *cis,trans/ trans,cis* isomers, *tt* – *trans,trans* isomers, *ttt* – *trans,trans,trans* isomers, *ttc* – *trans,trans,cis* isomers, *cct* – *cis,cis,trans* isomers, AV - acidic value; DPPH - 1,1-diphenyl-2-picrylhydrazyl; FRAP - ferric reducing antioxidant power; IV - iodine value; PV - peroxide value; 0.00 – amount was below the quantification limit (<LOQ); nd – not detected; tr – trace amount.
